# Supplementary material for: A feasibility study to evaluate a purposeful walk intervention with a distance goal using a commercially available activity monitor in elderly people post total hip replacement surgery
Source: PubMed Central journal article supplement (PMC10447967; doi:10.1177/20556683231195927), 2023-08-22
Supplement: sj-pdf-2-jrt-10.1177_20556683231195927.pdf [file sj-pdf-2-jrt-10.1177_20556683231195927.pdf]

PASE  
Physical Activity Scale  
for the Elderly

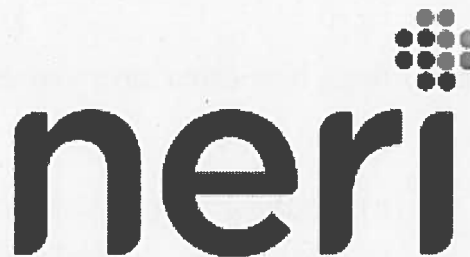

New England Research Institutes

© 1991

**New England Research Institutes, Inc.**

9 Galen Street Watertown, MA 02472

617.923.7747 <http://www.neriscience.com>

## **INSTRUCTIONS:**

Please complete this questionnaire by either circling the correct response or filling in the blank. Here is an example:

During the past 7 days, how often have you seen the sun?

|            |                           |                              |                          |
|------------|---------------------------|------------------------------|--------------------------|
| [0.] NEVER | [1.] SELDOM<br>(1-2 DAYS) | [2.] SOMETIMES<br>(3-4 DAYS) | [3.] OFTEN<br>(5-7 DAYS) |
|------------|---------------------------|------------------------------|--------------------------|

Answer all items as accurately as possible. All information is strictly confidential.

## LEISURE TIME ACTIVITY

1. Over the past 7 days, how often did you participate in sitting activities such as reading, watching TV or doing handcrafts?

[0.] NEVER

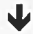

GO TO Q.#2

[1.] SELDOM  
(1-2 DAYS)

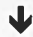

[2.] SOMETIMES  
(3-4 DAYS)

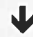

[3.] OFTEN  
(5-7 DAYS)

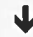

1a. What were these activities?

\_\_\_\_\_

1b. On average, how many hours per day did you engage in these sitting activities?

[1.] LESS THAN 1 HOUR [2.] 1 BUT LESS THAN 2 HOURS

[3.] 2-4 HOURS [4.] MORE THAN 4 HOURS

2. Over the past 7 days, how often did you take a walk outside your home or yard for any reason? For example, for fun or exercise, walking to work, walking the dog, etc.?

[0.] NEVER

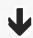

GO TO Q.#3

[1.] SELDOM  
(1-2 DAYS)

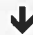

[2.] SOMETIMES  
(3-4 DAYS)

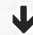

[3.] OFTEN  
(5-7 DAYS)

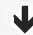

2a. On average, how many hours per day did you spend walking?

[1.] LESS THAN 1 HOUR [2.] 1 BUT LESS THAN 2 HOURS

[3.] 2-4 HOURS [4.] MORE THAN 4 HOURS

3. Over the past 7 days, how often did you engage in light sport or recreational activities such as bowling, golf with a cart, shuffleboard, fishing from a boat or pier or other similar activities?

[0.] NEVER

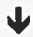

GO TO Q.#4

[1.] SELDOM

(1-2 DAYS)

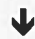

[2.] SOMETIMES

(3-4 DAYS)

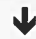

[3.] OFTEN

(5-7 DAYS)

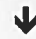

3a. What were these activities?

\_\_\_\_\_

3b. On average, how many hours per day did you engage in these light sport or recreational activities?

[1.] LESS THAN 1 HOUR [2.] 1 BUT LESS THAN 2 HOURS

[3.] 2-4 HOURS [4.] MORE THAN 4 HOURS

4. Over the past 7 days, how often did you engage in moderate sport and recreational activities such as doubles tennis, ballroom dancing, hunting, ice skating, golf without a cart, softball or other similar activities?

[0.] NEVER

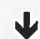

GO TO Q.#5

[1.] SELDOM

(1-2 DAYS)

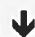

[2.] SOMETIMES

(3-4 DAYS)

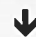

[3.] OFTEN

(5-7 DAYS)

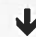

4a. What were these activities?

\_\_\_\_\_

4b. On average, how many hours per day did you engage in these moderate sport and recreational activities?

[1.] LESS THAN 1 HOUR [2.] 1 BUT LESS THAN 2 HOURS

[3.] 2-4 HOURS [4.] MORE THAN 4 HOURS

5. Over the past 7 days, how often did you engage in strenuous sport and recreational activities such as jogging, swimming, cycling, singles tennis, aerobic dance, skiing (downhill or cross-country) or other similar activities?

[0.] NEVER

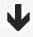

GO TO Q.#6

[1.] SELDOM

(1-2 DAYS)

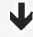

[2.] SOMETIMES

(3-4 DAYS)

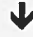

[3.] OFTEN

(5-7 DAYS)

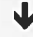

5a. What were these activities?

\_\_\_\_\_

5b. On average, how many hours per day did you engage in these strenuous sport and recreational activities?

[1.] LESS THAN 1 HOUR [2.] 1 BUT LESS THAN 2 HOURS

[3.] 2-4 HOURS [4.] MORE THAN 4 HOURS

6. Over the past 7 days, how often did you do any exercises specifically to increase muscle strength and endurance, such as lifting weights or pushups, etc.?

[0.] NEVER

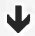

GO TO Q.#7

[1.] SELDOM

(1-2 DAYS)

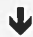

[2.] SOMETIMES

(3-4 DAYS)

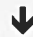

[3.] OFTEN

(5-7 DAYS)

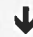

6a. What were these activities?

\_\_\_\_\_

6b. On average, how many hours per day did you engage in exercises to increase muscle strength and endurance?

[1.] LESS THAN 1 HOUR [2.] 1 BUT LESS THAN 2 HOURS

[3.] 2-4 HOURS [4.] MORE THAN 4 HOURS

## HOUSEHOLD ACTIVITY

7. During the past 7 days, have you done any light housework, such as dusting or washing dishes?

[1.] NO      [2.] YES

8. During the past 7 days, have you done any heavy housework or chores, such as vacuuming, scrubbing floors, washing windows, or carrying wood?

[1.] NO      [2.] YES

9. During the past 7 days, did you engage in any of the following activities?

Please answer YES or NO for each item.

|                                                                                      | <u>NO</u> | <u>YES</u> |
|--------------------------------------------------------------------------------------|-----------|------------|
| a. Home repairs like painting, wallpapering, electrical work, etc.                   | 1         | 2          |
| b. Lawn work or yard care, including snow or leaf removal, wood chopping, etc.       | 1         | 2          |
| c. Outdoor gardening                                                                 | 1         | 2          |
| d. Caring for an other person, such as children, dependent spouse, or an other adult | 1         | 2          |

## WORK-RELATED ACTIVITY

10. During the past 7 days, did you work for pay or as a volunteer?

[1.] NO      [2.] YES

10a. How many hours per week did you work for pay and/or as a volunteer?

\_\_\_\_\_ HOURS

10b. Which of the following categories best describes the amount of physical activity required on your job and/or volunteer work?

- [1] Mainly sitting with slight arm movements.  
[Examples: office worker, watchmaker, seated assembly line worker, bus driver, etc.]
- [2] Sitting or standing with some walking.  
[Examples: cashier, general office worker, light tool and machinery worker.]
- [3] Walking, with some handling of materials generally weighing less than 50 pounds.  
[Examples: mailman, waiter/waitress, construction worker, heavy tool and machinery worker.]
- [4] Walking and heavy manual work often requiring handling of materials weighing over 50 pounds.  
[Examples: lumberjack, stone mason, farm or general laborer.]

**THANK YOU FOR TAKING THE TIME AND EFFORT  
TO COMPLETE THIS QUESTIONNAIRE!**
