# Supplementary material for: A feasibility study to evaluate a purposeful walk intervention with a distance goal using a commercially available activity monitor in elderly people post total hip replacement surgery
Source: PubMed Central journal article supplement (PMC10447967; doi:10.1177/20556683231195927), 2023-08-22
Supplement: sj-pdf-3-jrt-10.1177_20556683231195927.pdf [file sj-pdf-3-jrt-10.1177_20556683231195927.pdf]

**Appendix.**

The Modified Gait Efficacy Scale (mGES)

1. How much confidence do you have that you would be able to safely walk on a level surface such as a hardwood floor?

|          |          |          |          |          |          |          |          |          |           |
|----------|----------|----------|----------|----------|----------|----------|----------|----------|-----------|
| <b>1</b> | <b>2</b> | <b>3</b> | <b>4</b> | <b>5</b> | <b>6</b> | <b>7</b> | <b>8</b> | <b>9</b> | <b>10</b> |
|          |          |          |          |          |          |          |          |          |           |

No Confidence

Complete Confidence

2. How much confidence do you have that you would be able to safely walk on grass?

|          |          |          |          |          |          |          |          |          |           |
|----------|----------|----------|----------|----------|----------|----------|----------|----------|-----------|
| <b>1</b> | <b>2</b> | <b>3</b> | <b>4</b> | <b>5</b> | <b>6</b> | <b>7</b> | <b>8</b> | <b>9</b> | <b>10</b> |
|          |          |          |          |          |          |          |          |          |           |

No Confidence

Complete Confidence

3. How much confidence do you have that you would be able to safely walk over an obstacle in your path?

|          |          |          |          |          |          |          |          |          |           |
|----------|----------|----------|----------|----------|----------|----------|----------|----------|-----------|
| <b>1</b> | <b>2</b> | <b>3</b> | <b>4</b> | <b>5</b> | <b>6</b> | <b>7</b> | <b>8</b> | <b>9</b> | <b>10</b> |
|          |          |          |          |          |          |          |          |          |           |

No Confidence

Complete Confidence

4. How much confidence do you have that you would be able to safely step down from a curb?

|          |          |          |          |          |          |          |          |          |           |
|----------|----------|----------|----------|----------|----------|----------|----------|----------|-----------|
| <b>1</b> | <b>2</b> | <b>3</b> | <b>4</b> | <b>5</b> | <b>6</b> | <b>7</b> | <b>8</b> | <b>9</b> | <b>10</b> |
|          |          |          |          |          |          |          |          |          |           |

No Confidence

Complete Confidence

5. How much confidence do you have that you would be able to safely step up onto a curb?

|          |          |          |          |          |          |          |          |          |           |
|----------|----------|----------|----------|----------|----------|----------|----------|----------|-----------|
| <b>1</b> | <b>2</b> | <b>3</b> | <b>4</b> | <b>5</b> | <b>6</b> | <b>7</b> | <b>8</b> | <b>9</b> | <b>10</b> |
|          |          |          |          |          |          |          |          |          |           |

No Confidence

Complete Confidence

6. How much confidence do you have that you would be able to safely walk up stairs if you are holding on to a railing?

|          |          |          |          |          |          |          |          |          |           |
|----------|----------|----------|----------|----------|----------|----------|----------|----------|-----------|
| <b>1</b> | <b>2</b> | <b>3</b> | <b>4</b> | <b>5</b> | <b>6</b> | <b>7</b> | <b>8</b> | <b>9</b> | <b>10</b> |
|          |          |          |          |          |          |          |          |          |           |

No Confidence

Complete Confidence

7. How much confidence do you have that you would be able to safely walk down stairs if you are holding on to a railing?

|          |          |          |          |          |          |          |          |          |           |
|----------|----------|----------|----------|----------|----------|----------|----------|----------|-----------|
| <b>1</b> | <b>2</b> | <b>3</b> | <b>4</b> | <b>5</b> | <b>6</b> | <b>7</b> | <b>8</b> | <b>9</b> | <b>10</b> |
|          |          |          |          |          |          |          |          |          |           |

No Confidence

Complete Confidence

8. How much confidence do you have that you would be able to safely walk up stairs if you are NOT holding on to a railing?

|          |          |          |          |          |          |          |          |          |           |
|----------|----------|----------|----------|----------|----------|----------|----------|----------|-----------|
| <b>1</b> | <b>2</b> | <b>3</b> | <b>4</b> | <b>5</b> | <b>6</b> | <b>7</b> | <b>8</b> | <b>9</b> | <b>10</b> |
|          |          |          |          |          |          |          |          |          |           |

No Confidence

Complete Confidence

(Continued)

---

## The Modified Gait Efficacy Scale

---

### Appendix.

Continued

---

9. How much confidence do you have that you would be able to safely walk down stairs if you are NOT holding on to a railing?

| 1 | 2 | 3 | 4 | 5 | 6 | 7 | 8 | 9 | 10 |
|---|---|---|---|---|---|---|---|---|----|
|   |   |   |   |   |   |   |   |   |    |

No Confidence

Complete Confidence

10. How much confidence do you have that you would be able to safely walk a long distance such as ½ mile?

| 1 | 2 | 3 | 4 | 5 | 6 | 7 | 8 | 9 | 10 |
|---|---|---|---|---|---|---|---|---|----|
|   |   |   |   |   |   |   |   |   |    |

No Confidence

Complete Confidence
