# Supplementary material for: A feasibility study to evaluate a purposeful walk intervention with a distance goal using a commercially available activity monitor in elderly people post total hip replacement surgery
Source: PubMed Central journal article supplement (PMC10447967; doi:10.1177/20556683231195927), 2023-08-22
Supplement: sj-pdf-4-jrt-10.1177_20556683231195927.pdf [file sj-pdf-4-jrt-10.1177_20556683231195927.pdf]

**Appendix A** - HOOS Questionnaire.

**Appendix B** - PASE Questionnaire.

**Appendix C** - mGES Questionnaire.

**Appendix D - Activity Diary.**

**Activity diary**

NAME.....

2. We would like you to record the amount of distance you walked in kilometres (Km) as recorded on your activity monitor and how intensely you felt you were exercising on average (Borg Scale). The Borg Scale is provided for you below, please use this as a guide and score yourself out of 10, (e.g. 1/10 representing hardly any exertion and 10/10 representing maximum effort).

Bring your activity diary with you to your follow-up assessment for review by the research team.

| RPE Scale | Rate of Perceived Exertion                                                                                                                                      |
|-----------|-----------------------------------------------------------------------------------------------------------------------------------------------------------------|
| 10        | <b>Max Effort Activity</b><br>Feels almost impossible to keep going. Completely out of breath, unable to talk. Cannot maintain for more than a very short time. |
| 9         | <b>Very Hard Activity</b><br>Very difficult to maintain exercise intensity. Can barely breath and speak only a few words.                                       |
| 7-8       | <b>Vigorous Activity</b><br>Borderline uncomfortable. Short of breath, can speak a sentence.                                                                    |
| 4-6       | <b>Moderate Activity</b><br>Breathing heavily, can hold short conversation. Still somewhat comfortable, but becoming noticeably more challenging.               |
| 2-3       | <b>Light Activity</b><br>Feels like you can maintain for hours. Easy to breathe and carry a conversation.                                                       |
| 1         | <b>Very Light Activity</b><br>Hardly any exertion, but more than sleeping, watching TV, etc.                                                                    |

| <b>Date</b><br><i>(Please write the date for every entry below)</i> | <b>DO NOT WRITE ANYTHING HERE</b>       | Daily Walk | Was your daily outdoor walk affected by any of the following? Please place an <b>X</b> on the scale to indicate your estimate level of fatigue, pain, and general busyness.                                                                                                                                                                                                                                 | Please use this section to expand on any condition/feelings which may have affected your daily outdoor walk for this day |
|---------------------------------------------------------------------|-----------------------------------------|------------|-------------------------------------------------------------------------------------------------------------------------------------------------------------------------------------------------------------------------------------------------------------------------------------------------------------------------------------------------------------------------------------------------------------|--------------------------------------------------------------------------------------------------------------------------|
|                                                                     | Total Distance<br><i>(km)</i>           |            | <p style="text-align: center;"><b>Fatigue</b></p> Not at all <span style="float: right;">Very much so</span><br>                                                                                                                                                                                                          |                                                                                                                          |
|                                                                     | Intensity <i>(Borg Scale i.e. 4/10)</i> |            | <p style="text-align: center;"><b>Pain</b></p> Not at all <span style="float: right;">Very much so</span><br> <p style="text-align: center;"><b>General Busyness</b></p> Not at all <span style="float: right;">Very much so</span><br> |                                                                                                                          |

|  |                               |  |                                                                                                                                                                                                                                                                                                                                                                                                                                                                                                                                                                                                                      |  |
|--|-------------------------------|--|----------------------------------------------------------------------------------------------------------------------------------------------------------------------------------------------------------------------------------------------------------------------------------------------------------------------------------------------------------------------------------------------------------------------------------------------------------------------------------------------------------------------------------------------------------------------------------------------------------------------|--|
|  | Total Distance<br><i>(km)</i> |  | <p style="text-align: center;"><b>Fatigue</b></p> Not at all <span style="float: right;">Very much so</span><br> <p style="text-align: center;"><b>Pain</b></p> Not at all <span style="float: right;">Very much so</span><br> <p style="text-align: center;"><b>General Busyness</b></p> Not at all <span style="float: right;">Very much so</span><br> |  |
|--|-------------------------------|--|----------------------------------------------------------------------------------------------------------------------------------------------------------------------------------------------------------------------------------------------------------------------------------------------------------------------------------------------------------------------------------------------------------------------------------------------------------------------------------------------------------------------------------------------------------------------------------------------------------------------|--|

|                                            |                                            |  |                                                                                                                              |
|--------------------------------------------|--------------------------------------------|--|------------------------------------------------------------------------------------------------------------------------------|
|                                            | Intensity (Borg Scale<br><i>i.e.</i> 4/10) |  |                                                                                                                              |
| Total Distance<br>(Km)                     |                                            |  | <p style="text-align: center;"><b>Fatigue</b></p> <p>Not at all <span style="float: right;">Very much so</span></p>          |
|                                            |                                            |  | <p style="text-align: center;"><b>Pain</b></p> <p>Not at all <span style="float: right;">Very much so</span></p>             |
| Intensity (Borg Scale<br><i>i.e.</i> 4/10) |                                            |  | <p style="text-align: center;"><b>General Busyness</b></p> <p>Not at all <span style="float: right;">Very much so</span></p> |
| Total Distance<br>(Km)                     |                                            |  | <p style="text-align: center;"><b>Fatigue</b></p> <p>Not at all <span style="float: right;">Very much so</span></p>          |
|                                            |                                            |  | <p style="text-align: center;"><b>Pain</b></p> <p>Not at all <span style="float: right;">Very much so</span></p>             |
|                                            |                                            |  | <p style="text-align: center;"><b>General Busyness</b></p> <p>Not at all <span style="float: right;">Very much so</span></p> |

|  |                                             |  |                                                                                                                                                                                                                                                                         |  |
|--|---------------------------------------------|--|-------------------------------------------------------------------------------------------------------------------------------------------------------------------------------------------------------------------------------------------------------------------------|--|
|  | <p>Intensity (Borg Scale<br/>i.e. 4/10)</p> |  |                                                                                                                                                                                       |  |
|  | <p>Total Distance<br/>(Km)</p>              |  | <p>Not at all <b>Fatigue</b> Very much so</p>                                                                                                                                         |  |
|  | <p>Intensity (Borg Scale<br/>i.e. 4/10)</p> |  | <p>Not at all <b>Pain</b> Very much so</p>  <p>Not at all <b>General Busyness</b> Very much so</p>  |  |

|  |                                                    |  |                                                                                                                                                                                                                                                                                                                                   |  |
|--|----------------------------------------------------|--|-----------------------------------------------------------------------------------------------------------------------------------------------------------------------------------------------------------------------------------------------------------------------------------------------------------------------------------|--|
|  | <p>Total Distance<br/><i>(Km)</i></p>              |  | <p style="text-align: center;"><b>Fatigue</b></p> <p>Not at all <span style="float: right;">Very much so</span></p> <hr/>                                                                                                                                                                                                         |  |
|  | <p>Intensity <i>(Borg Scale<br/>i.e. 4/10)</i></p> |  | <p>Not at all <span style="float: right;">Very much so</span></p> <hr/> <p style="text-align: center;"><b>Pain</b></p> <p>Not at all <span style="float: right;">Very much so</span></p> <hr/> <p style="text-align: center;"><b>General Busyness</b></p> <p>Not at all <span style="float: right;">Very much so</span></p> <hr/> |  |
|  | <p>Total Distance<br/><i>(km)</i></p>              |  | <p style="text-align: center;"><b>Fatigue</b></p> <p>Not at all <span style="float: right;">Very much so</span></p> <hr/>                                                                                                                                                                                                         |  |
|  | <p>Intensity <i>(Borg Scale<br/>i.e. 4/10)</i></p> |  | <p>Not at all <span style="float: right;">Very much so</span></p> <hr/> <p style="text-align: center;"><b>Pain</b></p> <p>Not at all <span style="float: right;">Very much so</span></p> <hr/> <p style="text-align: center;"><b>General Busyness</b></p> <p>Not at all <span style="float: right;">Very much so</span></p> <hr/> |  |

|  |                                             |  |                                                                                                                                                                                                                                                                                                                                   |  |
|--|---------------------------------------------|--|-----------------------------------------------------------------------------------------------------------------------------------------------------------------------------------------------------------------------------------------------------------------------------------------------------------------------------------|--|
|  | Total Distance<br><i>(Km)</i>               |  | <p style="text-align: center;"><b>Fatigue</b></p> <p>Not at all <span style="float: right;">Very much so</span></p> <hr/>                                                                                                                                                                                                         |  |
|  | Intensity <i>(Borg Scale<br/>i.e. 4/10)</i> |  | <p>Not at all <span style="float: right;">Very much so</span></p> <hr/> <p style="text-align: center;"><b>Pain</b></p> <p>Not at all <span style="float: right;">Very much so</span></p> <hr/> <p style="text-align: center;"><b>General Busyness</b></p> <p>Not at all <span style="float: right;">Very much so</span></p> <hr/> |  |
|  | Total Distance<br><i>(Km)</i>               |  | <p style="text-align: center;"><b>Fatigue</b></p> <p>Not at all <span style="float: right;">Very much so</span></p> <hr/>                                                                                                                                                                                                         |  |
|  | Intensity <i>(Borg Scale<br/>i.e. 4/10)</i> |  | <p>Not at all <span style="float: right;">Very much so</span></p> <hr/> <p style="text-align: center;"><b>Pain</b></p> <p>Not at all <span style="float: right;">Very much so</span></p> <hr/> <p style="text-align: center;"><b>General Busyness</b></p> <p>Not at all <span style="float: right;">Very much so</span></p> <hr/> |  |

|  |                                                    |  |                                                                                                                                                                                                                                                                                                                             |  |
|--|----------------------------------------------------|--|-----------------------------------------------------------------------------------------------------------------------------------------------------------------------------------------------------------------------------------------------------------------------------------------------------------------------------|--|
|  | <p>Total Distance<br/><i>(Km)</i></p>              |  | <p style="text-align: center;"><b>Fatigue</b></p> <p>Not at all <span style="float: right;">Very much so</span></p> <hr style="border: 1px solid black;"/>                                                                                                                                                                  |  |
|  | <p>Intensity <i>(Borg Scale<br/>i.e. 4/10)</i></p> |  | <p style="text-align: center;"><b>Pain</b></p> <p>Not at all <span style="float: right;">Very much so</span></p> <hr style="border: 1px solid black;"/> <p style="text-align: center;"><b>General Busyness</b></p> <p>Not at all <span style="float: right;">Very much so</span></p> <hr style="border: 1px solid black;"/> |  |
|  | <p>Total Distance<br/><i>(Km)</i></p>              |  | <p style="text-align: center;"><b>Fatigue</b></p> <p>Not at all <span style="float: right;">Very much so</span></p> <hr style="border: 1px solid black;"/>                                                                                                                                                                  |  |
|  | <p>Intensity <i>(Borg Scale<br/>i.e. 4/10)</i></p> |  | <p style="text-align: center;"><b>Pain</b></p> <p>Not at all <span style="float: right;">Very much so</span></p> <hr style="border: 1px solid black;"/> <p style="text-align: center;"><b>General Busyness</b></p> <p>Not at all <span style="float: right;">Very much so</span></p> <hr style="border: 1px solid black;"/> |  |



|  |                                                    |  |                                                                                                                                                                                                                                                                                                                                                                                                                         |  |
|--|----------------------------------------------------|--|-------------------------------------------------------------------------------------------------------------------------------------------------------------------------------------------------------------------------------------------------------------------------------------------------------------------------------------------------------------------------------------------------------------------------|--|
|  | <p>Total Distance<br/><i>(km)</i></p>              |  | <p style="text-align: center;"><b>Fatigue</b></p> <p>Not at all <span style="float: right;">Very much so</span></p>                                                                                                                                                                                                                   |  |
|  | <p>Intensity <i>(Borg Scale<br/>i.e. 4/10)</i></p> |  | <p>Not at all <span style="float: right;">Very much so</span></p>  <p style="text-align: center;"><b>Pain</b></p> <p>Not at all <span style="float: right;">Very much so</span></p>  <p style="text-align: center;"><b>General Busyness</b></p>     |  |
|  | <p>Total Distance<br/><i>(Km)</i></p>              |  | <p style="text-align: center;"><b>Fatigue</b></p> <p>Not at all <span style="float: right;">Very much so</span></p>                                                                                                                                                                                                                   |  |
|  | <p>Intensity <i>(Borg Scale<br/>i.e. 4/10)</i></p> |  | <p>Not at all <span style="float: right;">Very much so</span></p>  <p style="text-align: center;"><b>Pain</b></p> <p>Not at all <span style="float: right;">Very much so</span></p>  <p style="text-align: center;"><b>General Busyness</b></p> |  |

|  |                                             |  |                                                                                                                                                                                                                                                                                                                                                                                                                                                                                        |  |
|--|---------------------------------------------|--|----------------------------------------------------------------------------------------------------------------------------------------------------------------------------------------------------------------------------------------------------------------------------------------------------------------------------------------------------------------------------------------------------------------------------------------------------------------------------------------|--|
|  | Total Distance<br><i>(Km)</i>               |  | <p style="text-align: center;"><b>Fatigue</b></p> <p>Not at all <span style="float: right;">Very much so</span></p> <hr style="border: 1px solid black;"/>                                                                                                                                                                                                                                                                                                                             |  |
|  | Intensity <i>(Borg Scale<br/>i.e. 4/10)</i> |  | <p style="text-align: center;"><b>Pain</b></p> <p>Not at all <span style="float: right;">Very much so</span></p> <hr style="border: 1px solid black;"/> <p style="text-align: center;"><b>General Busyness</b></p> <p>Not at all <span style="float: right;">Very much so</span></p> <hr style="border: 1px solid black;"/>                                                                                                                                                            |  |
|  | Total Distance<br><i>(Km)</i>               |  | <p style="text-align: center;"><b>Fatigue</b></p> <p>Not at all <span style="float: right;">Very much so</span></p> <hr style="border: 1px solid black;"/> <p style="text-align: center;"><b>Pain</b></p> <p>Not at all <span style="float: right;">Very much so</span></p> <hr style="border: 1px solid black;"/> <p style="text-align: center;"><b>General Busyness</b></p> <p>Not at all <span style="float: right;">Very much so</span></p> <hr style="border: 1px solid black;"/> |  |

|                                            |                                            |  |                                                                                                                              |
|--------------------------------------------|--------------------------------------------|--|------------------------------------------------------------------------------------------------------------------------------|
|                                            | Intensity (Borg Scale<br><i>i.e.</i> 4/10) |  |                                                                                                                              |
| Total Distance<br>(Km)                     |                                            |  | <p style="text-align: center;"><b>Fatigue</b></p> <p>Not at all <span style="float: right;">Very much so</span></p>          |
|                                            |                                            |  | <p style="text-align: center;"><b>Pain</b></p> <p>Not at all <span style="float: right;">Very much so</span></p>             |
| Intensity (Borg Scale<br><i>i.e.</i> 4/10) |                                            |  | <p style="text-align: center;"><b>General Busyness</b></p> <p>Not at all <span style="float: right;">Very much so</span></p> |
|                                            |                                            |  |                                                                                                                              |
| Total Distance<br>(km)                     |                                            |  | <p style="text-align: center;"><b>Fatigue</b></p> <p>Not at all <span style="float: right;">Very much so</span></p>          |
|                                            |                                            |  | <p style="text-align: center;"><b>Pain</b></p> <p>Not at all <span style="float: right;">Very much so</span></p>             |
|                                            |                                            |  | <p style="text-align: center;"><b>General Busyness</b></p> <p>Not at all <span style="float: right;">Very much so</span></p> |

|  |                                                           |  |                                                                                                                                                                                                                                                                                                                                                             |  |
|--|-----------------------------------------------------------|--|-------------------------------------------------------------------------------------------------------------------------------------------------------------------------------------------------------------------------------------------------------------------------------------------------------------------------------------------------------------|--|
|  | <p>Intensity (<i>Borg Scale</i><br/><i>i.e. 4/10</i>)</p> |  |                                                                                                                                                                                                                                                                           |  |
|  | <p>Total Distance<br/>(<i>Km</i>)</p>                     |  | <p>Not at all                      <b>Fatigue</b>                      Very much so</p>                                                                                                                                                                                   |  |
|  | <p>Intensity (<i>Borg Scale</i><br/><i>i.e. 4/10</i>)</p> |  | <p>Not at all                      <b>Pain</b>                      Very much so</p>  <p>Not at all                      <b>General Busyness</b>                      Very much so</p>  |  |

|  |                                             |  |                                                                                                                                                                                                                                                           |  |
|--|---------------------------------------------|--|-----------------------------------------------------------------------------------------------------------------------------------------------------------------------------------------------------------------------------------------------------------|--|
|  | Total Distance<br><i>(Km)</i>               |  | <p style="text-align: center;"><b>Fatigue</b></p> <p>Not at all <span style="float: right;">Very much so</span></p> <hr/>                                                                                                                                 |  |
|  | Intensity <i>(Borg Scale<br/>i.e. 4/10)</i> |  | <p style="text-align: center;"><b>Pain</b></p> <p>Not at all <span style="float: right;">Very much so</span></p> <hr/> <p style="text-align: center;"><b>General Busyness</b></p> <p>Not at all <span style="float: right;">Very much so</span></p> <hr/> |  |
|  | Total Distance<br><i>(km)</i>               |  | <p style="text-align: center;"><b>Fatigue</b></p> <p>Not at all <span style="float: right;">Very much so</span></p> <hr/>                                                                                                                                 |  |
|  | Intensity <i>(Borg Scale<br/>i.e. 4/10)</i> |  | <p style="text-align: center;"><b>Pain</b></p> <p>Not at all <span style="float: right;">Very much so</span></p> <hr/> <p style="text-align: center;"><b>General Busyness</b></p> <p>Not at all <span style="float: right;">Very much so</span></p> <hr/> |  |

|  |                                             |  |                                                                                                                                                                                                                                                                                                                                                                                                                         |  |
|--|---------------------------------------------|--|-------------------------------------------------------------------------------------------------------------------------------------------------------------------------------------------------------------------------------------------------------------------------------------------------------------------------------------------------------------------------------------------------------------------------|--|
|  | <p>Total Distance<br/>(Km)</p>              |  | <p style="text-align: center;"><b>Fatigue</b></p> <p>Not at all <span style="float: right;">Very much so</span></p>                                                                                                                                                                                                                   |  |
|  | <p>Intensity (Borg Scale<br/>i.e. 4/10)</p> |  | <p>Not at all <span style="float: right;">Very much so</span></p>  <p style="text-align: center;"><b>Pain</b></p> <p>Not at all <span style="float: right;">Very much so</span></p>  <p style="text-align: center;"><b>General Busyness</b></p>     |  |
|  | <p>Total Distance<br/>(Km)</p>              |  | <p style="text-align: center;"><b>Fatigue</b></p> <p>Not at all <span style="float: right;">Very much so</span></p>                                                                                                                                                                                                                  |  |
|  | <p>Intensity (Borg Scale<br/>i.e. 4/10)</p> |  | <p>Not at all <span style="float: right;">Very much so</span></p>  <p style="text-align: center;"><b>Pain</b></p> <p>Not at all <span style="float: right;">Very much so</span></p>  <p style="text-align: center;"><b>General Busyness</b></p> |  |

|  |                                                    |  |                                                                                                                                                                                                                                                                                                                                                                                                                                                                                                                                                                                                                              |  |
|--|----------------------------------------------------|--|------------------------------------------------------------------------------------------------------------------------------------------------------------------------------------------------------------------------------------------------------------------------------------------------------------------------------------------------------------------------------------------------------------------------------------------------------------------------------------------------------------------------------------------------------------------------------------------------------------------------------|--|
|  | <p>Total Distance<br/><i>(Km)</i></p>              |  | <p style="text-align: center;"><b>Fatigue</b></p> <p>Not at all <span style="float: right;">Very much so</span></p>                                                                                                                                                                                                                                                                                                                                                                                                                        |  |
|  | <p>Intensity <i>(Borg Scale<br/>i.e. 4/10)</i></p> |  | <p style="text-align: center;"><b>Pain</b></p> <p>Not at all <span style="float: right;">Very much so</span></p>  <p style="text-align: center;"><b>General Busyness</b></p> <p>Not at all <span style="float: right;">Very much so</span></p>                                                                                                                                                                                                           |  |
|  | <p>Total Distance<br/><i>(Km)</i></p>              |  | <p style="text-align: center;"><b>Fatigue</b></p> <p>Not at all <span style="float: right;">Very much so</span></p>  <p style="text-align: center;"><b>Pain</b></p> <p>Not at all <span style="float: right;">Very much so</span></p>  <p style="text-align: center;"><b>General Busyness</b></p> <p>Not at all <span style="float: right;">Very much so</span></p>  |  |

|                        |                                            |  |                                                                                                                                                                                                                                                                                                                                                                                                                                                       |
|------------------------|--------------------------------------------|--|-------------------------------------------------------------------------------------------------------------------------------------------------------------------------------------------------------------------------------------------------------------------------------------------------------------------------------------------------------------------------------------------------------------------------------------------------------|
|                        | Intensity (Borg Scale<br><i>i.e.</i> 4/10) |  |                                                                                                                                                                                                                                                                                                                                                                                                                                                       |
| Total Distance<br>(km) |                                            |  | <p style="text-align: center;"><b>Fatigue</b></p> <p>Not at all <span style="float: right;">Very much so</span></p> <hr/> <p>Not at all <span style="float: right;">Very much so</span></p> <p style="text-align: center;"><b>Pain</b></p> <hr/> <p>Not at all <span style="float: right;">Very much so</span></p> <p style="text-align: center;"><b>General Busyness</b></p> <hr/> <p>Not at all <span style="float: right;">Very much so</span></p> |
|                        | Intensity (Borg Scale<br><i>i.e.</i> 4/10) |  |                                                                                                                                                                                                                                                                                                                                                                                                                                                       |
| Total Distance<br>(Km) |                                            |  | <p style="text-align: center;"><b>Fatigue</b></p> <p>Not at all <span style="float: right;">Very much so</span></p> <hr/> <p>Not at all <span style="float: right;">Very much so</span></p> <p style="text-align: center;"><b>Pain</b></p> <hr/> <p>Not at all <span style="float: right;">Very much so</span></p> <p style="text-align: center;"><b>General Busyness</b></p> <hr/> <p>Not at all <span style="float: right;">Very much so</span></p> |
|                        | Intensity (Borg Scale<br><i>i.e.</i> 4/10) |  |                                                                                                                                                                                                                                                                                                                                                                                                                                                       |



|  |                                                           |  |                                                                                                                                                                                                                                                                                                                                                             |  |
|--|-----------------------------------------------------------|--|-------------------------------------------------------------------------------------------------------------------------------------------------------------------------------------------------------------------------------------------------------------------------------------------------------------------------------------------------------------|--|
|  | <p>Intensity (<i>Borg Scale</i><br/><i>i.e. 4/10</i>)</p> |  |                                                                                                                                                                                                                                                                           |  |
|  | <p>Total Distance<br/>(<i>Km</i>)</p>                     |  | <p>Not at all                      <b>Fatigue</b>                      Very much so</p>                                                                                                                                                                                   |  |
|  | <p>Intensity (<i>Borg Scale</i><br/><i>i.e. 4/10</i>)</p> |  | <p>Not at all                      <b>Pain</b>                      Very much so</p>  <p>Not at all                      <b>General Busyness</b>                      Very much so</p>  |  |

|  |                                                    |  |                                                                                                                                                                                                                                                                                                                                                                                                                                      |  |
|--|----------------------------------------------------|--|--------------------------------------------------------------------------------------------------------------------------------------------------------------------------------------------------------------------------------------------------------------------------------------------------------------------------------------------------------------------------------------------------------------------------------------|--|
|  | <p>Total Distance<br/><i>(Km)</i></p>              |  | <p style="text-align: center;"><b>Fatigue</b></p> <p>Not at all <span style="float: right;">Very much so</span></p> <hr style="border: 1px solid black;"/>                                                                                                                                                                                                                                                                           |  |
|  | <p>Intensity <i>(Borg Scale<br/>i.e. 4/10)</i></p> |  | <p>Not at all <span style="float: right;">Very much so</span></p> <hr style="border: 1px solid black;"/> <p style="text-align: center;"><b>Pain</b></p> <p>Not at all <span style="float: right;">Very much so</span></p> <hr style="border: 1px solid black;"/> <p style="text-align: center;"><b>General Busyness</b></p> <p>Not at all <span style="float: right;">Very much so</span></p> <hr style="border: 1px solid black;"/> |  |

**Appendix E** - Interview topic guide.

**Subject 1: Activity Monitor**

*What was it like to wear the activity monitor?*

*What was it like to use the activity monitor?*

*Did the activity monitor encourage you to do a daily walk (achieved your daily goals)? (Remember to ask 'How' if they didn't expand on it)*

*What were your thoughts on the use of activity monitors prior to study?*

*Would you consider buying an activity monitor? Could you please explain why.*

**Subject 2: Purposeful walking:**

*How did you feel about going for your outdoor walks?*

*Did you find your goals manageable? Could you please explain*

*Did you find your daily distance goals helpful with increasing your daily activity?*

*Could you please explain*

**Subject 3: Time (testing/intervention)**

*How did you feel about the amount of time you spent with us on baseline day and follow up day testing?*

*How did you feel about being part of a study that involves you for 5 weeks?*

*What did you think about the layout of the activity diary?*

*How did you feel about completing the daily activity diary?*

*What are your thoughts on the style of questions asked in the activity diary? Could you please explain*

**Subject 4: Explore**

*Were there any challenges that you would like to share in regard to doing your daily outdoor walking?*

*Were there any positive experiences that you would like to share in regard to doing your daily outdoor walking.*
